# Supplementary material for: Facile synthesis and in vivo evaluation of biodegradable dendritic MRI contrast agents
Source: Royal Society of Chemistry journal article supplement (doi:10.1039/c2jm32211k), 2012-01-01
Supplement: c2jm32211k.pdf [file c2jm32211k.pdf]

Supplementary Information for

## Facile Synthesis and *in Vivo* Evaluation of Biodegradable Dendritic MRI Contrast Agents

Mingzhou Ye,<sup>a</sup> Yuce Qian,<sup>b</sup> Youqing Shen,<sup>a</sup> Hongjie Hu,<sup>b</sup> Meihua Sui<sup>a</sup> and Jianbin Tang<sup>a\*</sup>

<sup>a</sup> Key Laboratory of Biomass Chemical Engineering of Ministry of Education, Center for Bionanoengineering, and Department of Chemical and Biological Engineering, Zhejiang University, Hangzhou, Zhejiang, 310027, China. E-mail: jianbin@zju.edu.cn

<sup>b</sup> Department of Radiology, Sir Run Run Shaw Hospital (SRRSH) of School of Medicine, Zhejiang University, Hangzhou, Zhejiang, 310027, China

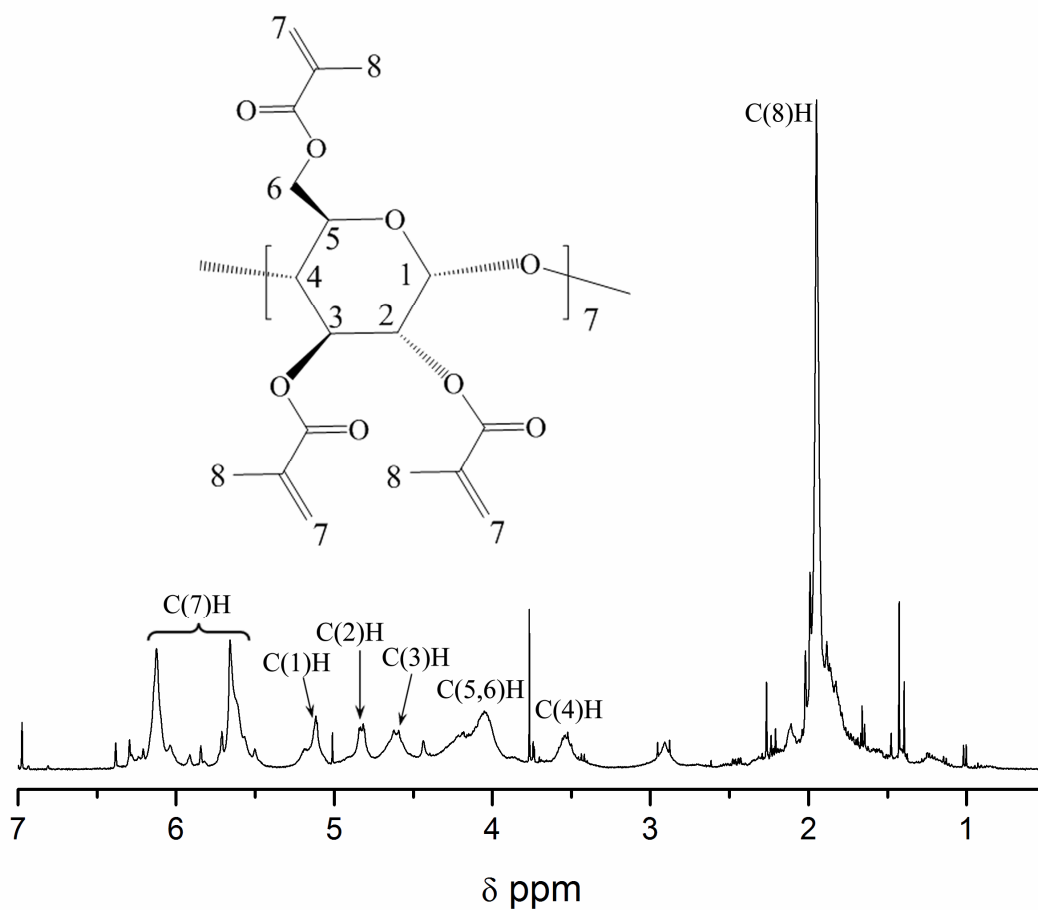

Fig. S1.  $^1\text{H-NMR}$  spectrum of  $\beta$ -CDMA.

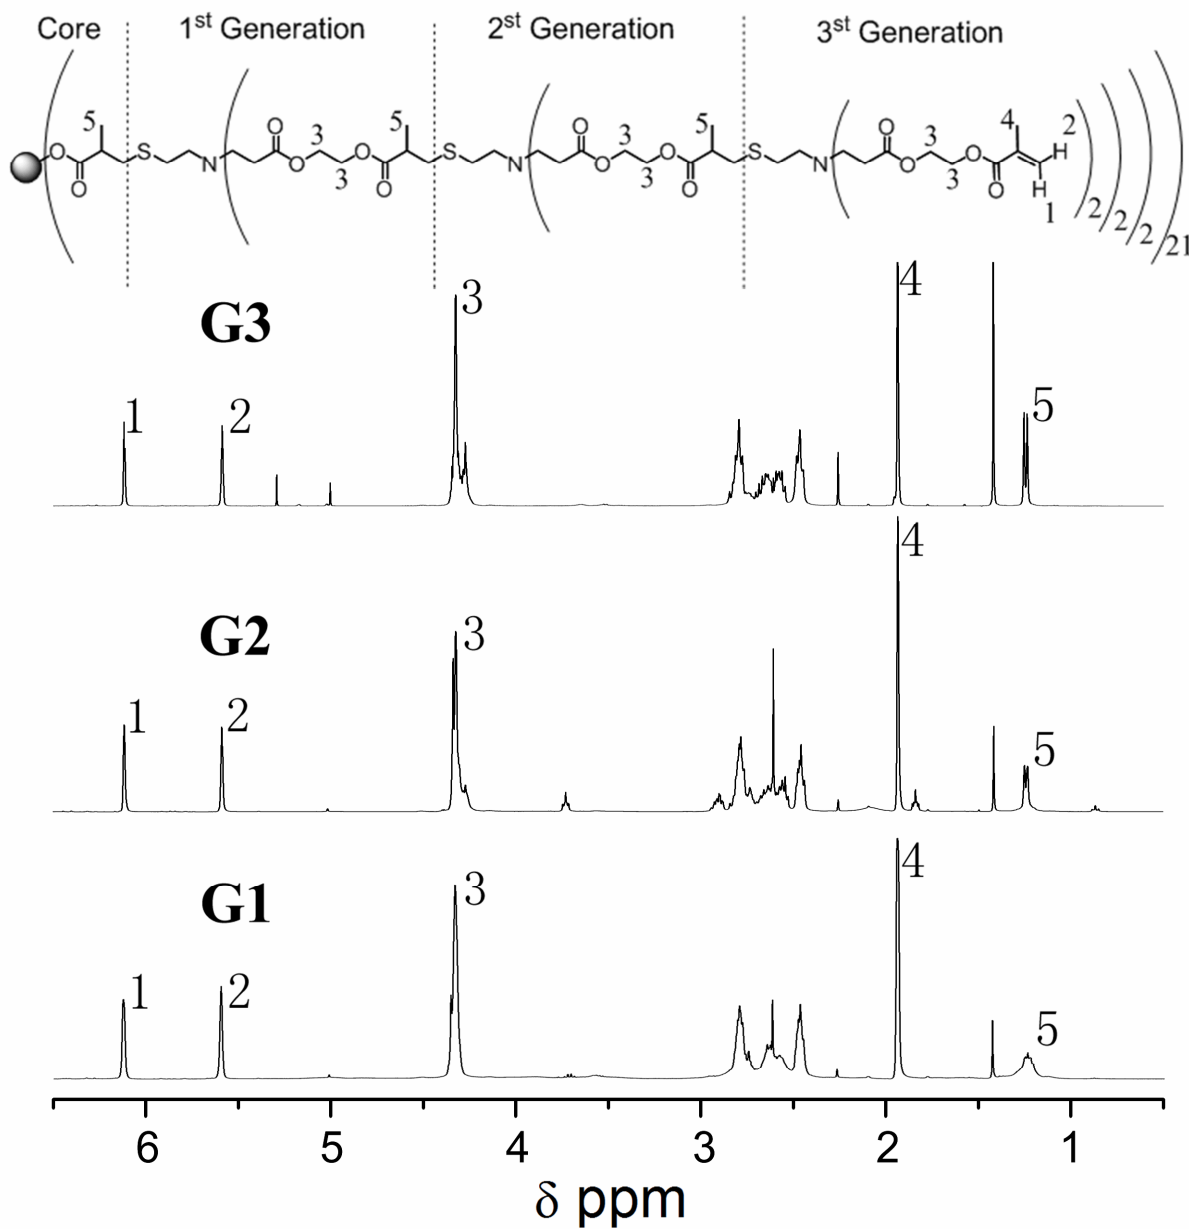

Fig. S2. <sup>1</sup>H-NMR spectra of the dendrimers.

Table S1. Mn and PDI of different generation, measured by GPC.

| Generation (Gx) | Mn (GPC) | Mw (GPC) | PDI  | Mn* (NMR) | # of peripheral methacrylate |
|-----------------|----------|----------|------|-----------|------------------------------|
| G0              | 1800     | 1800     | 1.01 | 2500      | 20                           |
| G1              | 7900     | 8100     | 1.03 | 11500     | 40                           |
| G2              | 14200    | 14800    | 1.04 | 29300     | 80                           |
| G3              | 24200    | 25100    | 1.04 | 64900     | 160                          |

\* The theoretically molecular weight calculated from the NMR spectra.

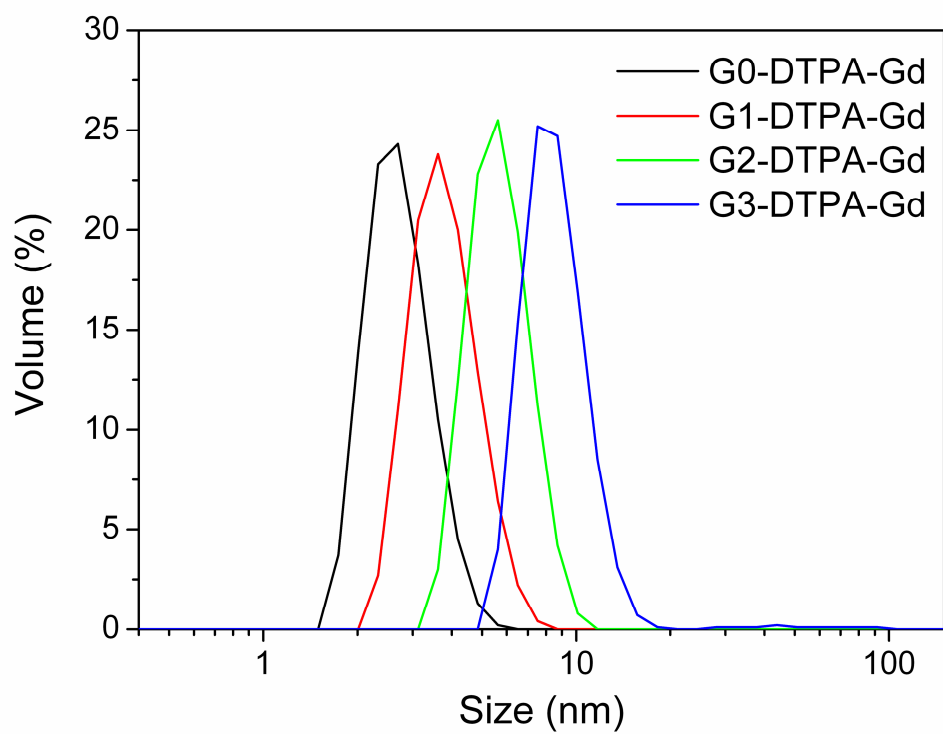

Figure S3. Size distribution of the DCAs measured by DLS

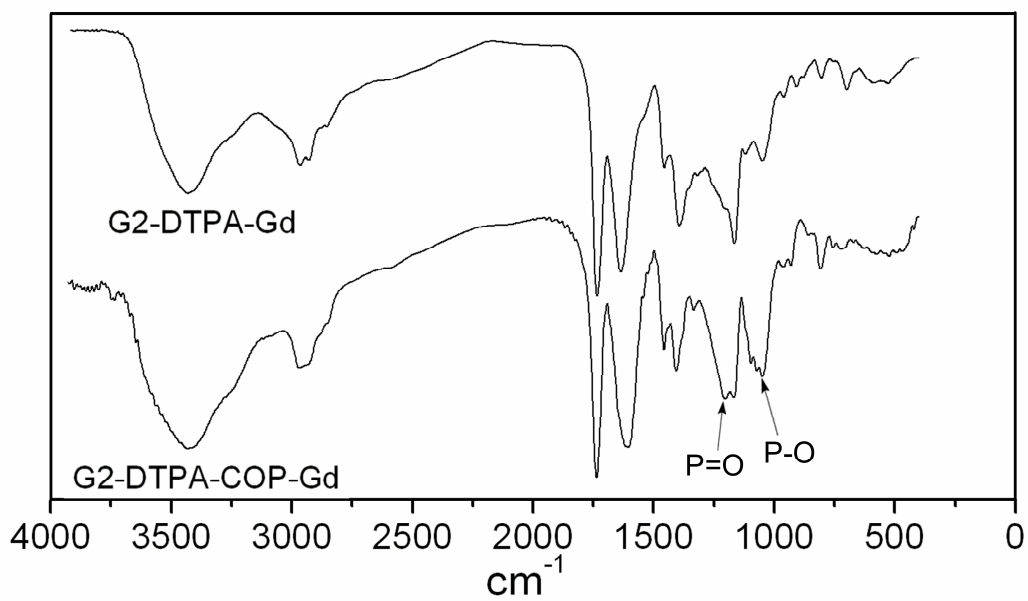

Fig. S4. FT-IR spectra of G2-DTPA-Gd and G2/COP-DTPA-Gd.
